# Supplementary material
Source: bioRxiv or medRxiv preprint supplement (https://www.biorxiv.org/highwire/filestream/114124/field_highwire_adjunct_files/0/376327-1.pdf)
Supplement: Supplementary file [file 376327-1.pdf]

1 **Supplementary material to:**

2 **Body mass ageing trajectory is modulated by environmental conditions but independent**  
3 **of lifespan**

4 Michael Briga<sup>1,3</sup>, Blanca Jimeno<sup>1,2</sup> and Simon Verhulst<sup>1</sup>

5 <sup>1</sup>Groningen Institute for Evolutionary Life Sciences, University of Groningen, Groningen, the  
6 Netherlands.

7 <sup>2</sup> Max Planck Institute for Ornithology, Seewiesen, Germany.

8 <sup>3</sup> Present address: Department of Biology, University of Turku, Turku, Finland.

9

10 **Table of contents**

|    |                                                                  |           |
|----|------------------------------------------------------------------|-----------|
| 11 | <b>1: Data distribution</b>                                      | <b>2</b>  |
| 12 | Fig. S1                                                          |           |
| 13 | <b>2: Time and seasonal effect on mass</b>                       | <b>3</b>  |
| 14 | Fig. S2, Table S1                                                |           |
| 15 | <b>3: Size and size independent manipulation effects on mass</b> | <b>5</b>  |
| 16 | Fig. S3                                                          |           |
| 17 | <b>4: Data distribution plots over <math>\Delta</math>age</b>    | <b>6</b>  |
| 18 | Fig. S4                                                          |           |
| 19 | <b>5: Model Selection tables</b>                                 | <b>7</b>  |
| 20 | Tables S2-S6                                                     |           |
| 21 | <b>6: References</b>                                             | <b>13</b> |

22 **Supplementary Information 1: Data distribution**

23 *Fig. S1: (A) Number of body mass measurements per bird and (B) their distribution with respect to age.*

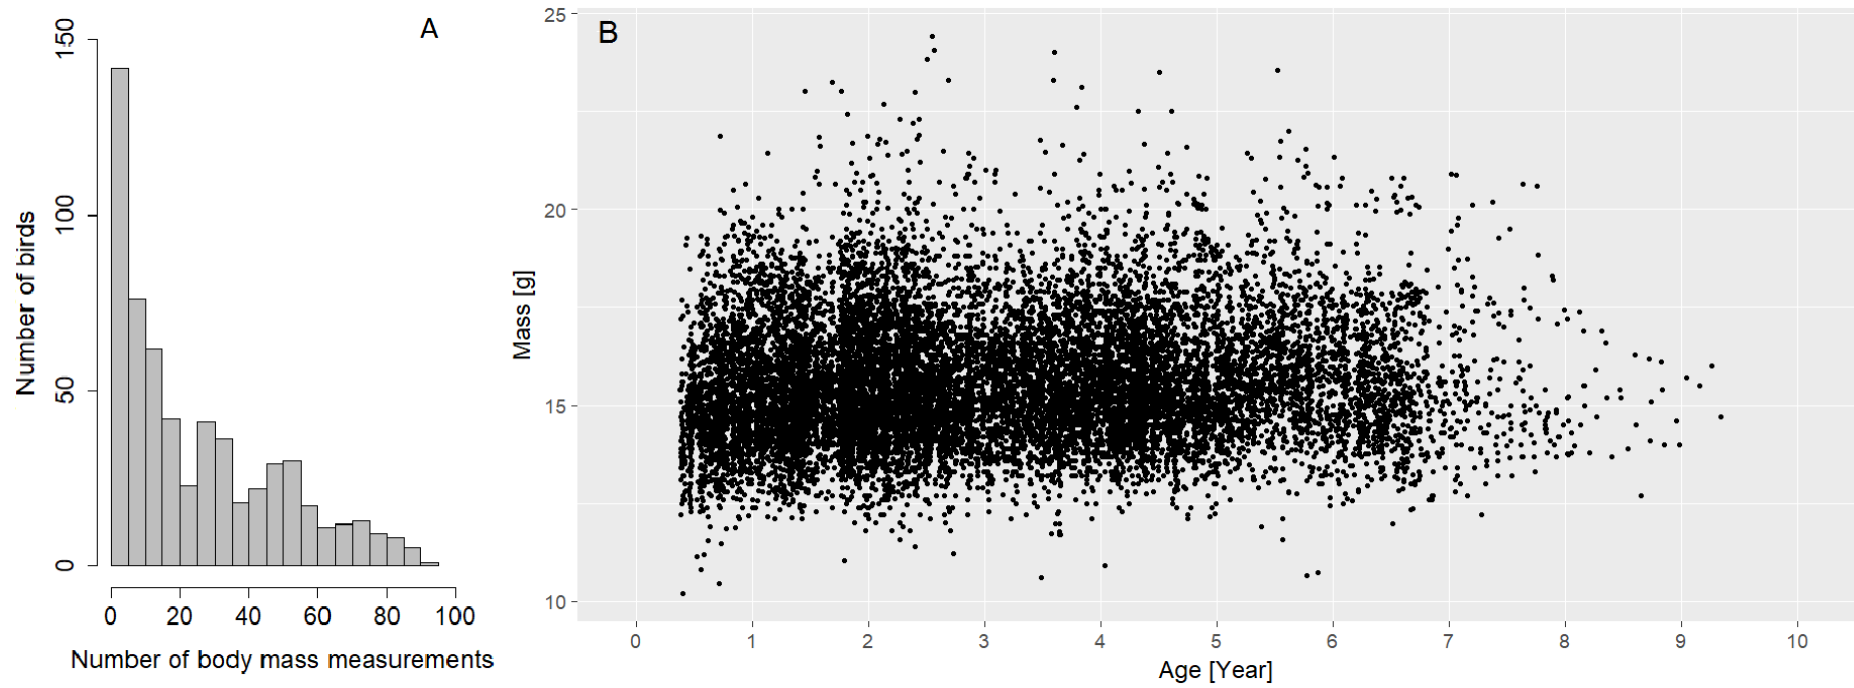

24

25

26 **Supplementary Information 2: Time and seasonal effects on mass**

27 Body mass measurements were taken throughout the day at any time between 6AM and 10PM (Fig.  
28 S2A) and throughout the year (Fig. S2B). To control for daily and seasonal variation in mass when  
29 analyzing age effects, we first investigated which daily and seasonal covariates affected mass (Table  
30 S1A). We found that birds get heavier within the day (time  $\Delta AICc = -2747.1$ ). The rate of weight gain  
31 was faster on shorter days with birds being lighter in the morning but ending up heavier at the end of  
32 the day (time \* nightlength  $\Delta AICc = -199.9$ ). In addition, there was a bi-seasonal effect on daily weight  
33 gain, with birds gaining weight faster over the day in the first half of the year relative to the second  
34 (time \* photoperiod  $\Delta AICc = -23.1$ ). Both seasonal effects combined resulted birds being a little  
35 lighter in winter compared to summer, which is inconsistent with most theoretical models (reviewed  
36 in [1]) and data (e.g. [2,3]) on winter fattening strategies in wild birds. These results are however  
37 consistent with what was found earlier in captive zebra finches [4]. Thus, birds showed daily mass  
38 gain at a season specific rate. We included these daily and seasonal covariates and their interactions  
39 in all analyses.

40 *Fig. S2: Distribution of body mass measurements through (A) time of the day and (B) month of the*  
41 *year.*

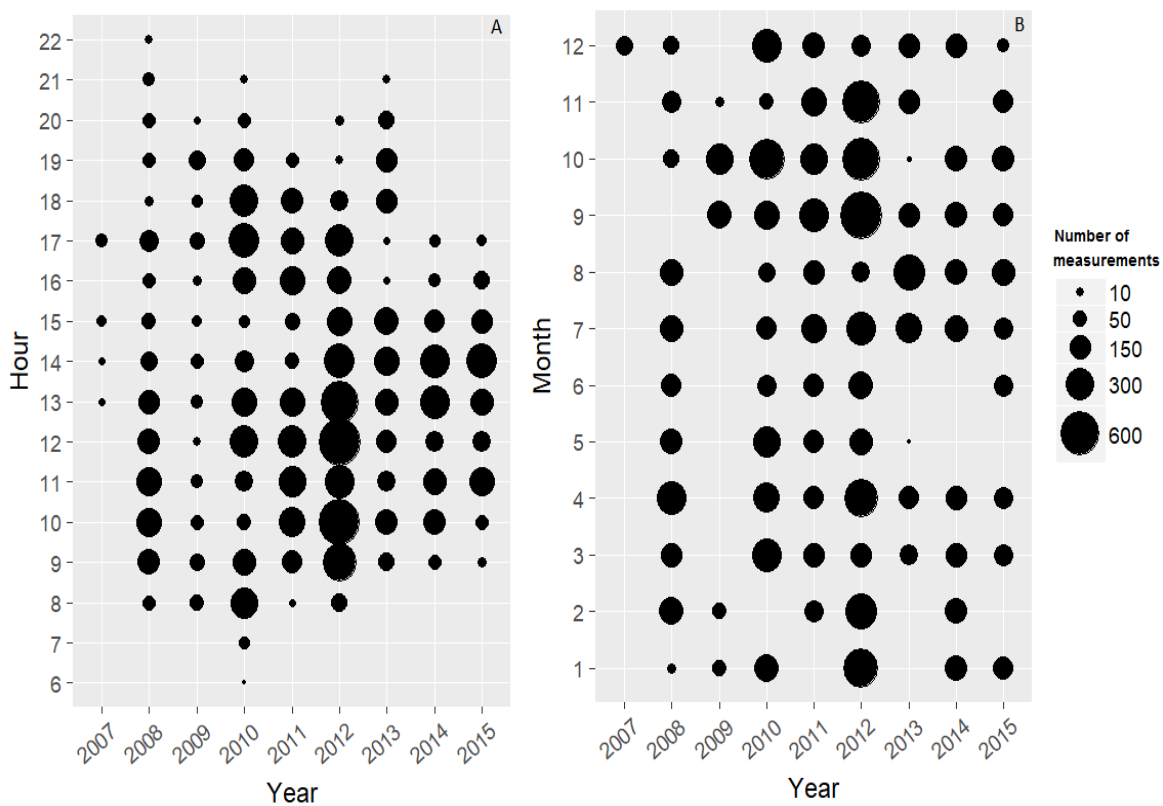

42

43

44 *Table S1: Model selection results for time and seasonal effects on mass. Photoperiod (Photo) is a*  
 45 *dichotomous variable coding for whether nightlength (Night) was increasing (0) or decreasing (1).*  
 46 *Models are ordered by increasing AICc.*

| <b>Model</b> | <b>Photo</b> | <b>Night</b> | <b>Time</b> | <b>Photo<br/>* Time</b> | <b>Night<br/>* Time</b> | <b>df</b> | <b>AICc</b> | <b>ΔAICc</b> | <b>weight</b> |
|--------------|--------------|--------------|-------------|-------------------------|-------------------------|-----------|-------------|--------------|---------------|
| 1            | -0.38        | -5.03        | -1.48       | 0.59                    | 7.51                    | 8         | 37455.8     | 0            | 1.00          |
| 2            |              | -4.41        | -0.66       |                         | 6.42                    | 6         | 37478.9     | 23.1         | 0.00          |
| 3            | -0.03        | -4.38        | -0.62       |                         | 6.35                    | 7         | 37483.5     | 27.8         | 0.00          |
| 4            | -0.04        | -0.77        | 2.54        |                         |                         | 6         | 37655.7     | 199.9        | 0.00          |
| 5            |              | -0.75        | 2.53        |                         |                         | 5         | 37655.8     | 200.0        | 0.00          |
| 6            | -0.04        | -0.77        | 2.54        | 0.01                    |                         | 7         | 37660.5     | 204.7        | 0.00          |
| 7            |              |              | 2.58        |                         |                         | 4         | 37844.4     | 388.6        | 0.00          |
| 8            | -0.02        |              | 2.59        |                         |                         | 5         | 37851.6     | 395.8        | 0.00          |
| 9            | -0.04        |              | 2.57        | 0.04                    |                         | 6         | 37856.3     | 400.5        | 0.00          |
| 10           |              | -0.96        |             |                         |                         | 4         | 40202.9     | 2747.1       | 0.00          |
| 11           | 0.01         | -0.96        |             |                         |                         | 5         | 40211.4     | 2755.6       | 0.00          |
| 12           |              |              |             |                         |                         | 3         | 40466.8     | 3011.0       | 0.00          |
| 13           | 0.03         |              |             |                         |                         | 4         | 40469.3     | 3013.6       | 0.00          |

47

48

49

### 50 **Supplementary Information 3: Size and size independent manipulation effects on mass**

51 The effect of our experimental manipulations on mass can reflect a variety of organismal changes.  
52 Here we examine in further detail to what extent the effects on mass arise due to size or whether it  
53 is independent of size. In our dataset mass is to a large extent determined by an individual's size  
54 ( $r^2=0.31$ ) and growing up in large broods resulted in a smaller size at adulthood (measured at the age  
55 of 120 days,  $N=594$  individuals,  $t=-4.37$ ,  $p=0.000014$ ). Birds were randomly allocated to the foraging  
56 cost treatment with respect to size ( $N=594$  individuals,  $t=-1.41$ ,  $p=0.16$ ) and thus, birds did not differ  
57 in size between foraging costs treatments. When analyzing the effects of the experimental  
58 manipulation on mass including structural body size as a covariate in the model, we found that both  
59 manipulations resulted in lower mass (developmental:  $\Delta AICc=-1.7$ ; adult:  $\Delta AICc=-40.8$ ). However, the  
60 effect of the brood size manipulation on size corrected mass was considerably smaller than that on  
61 whole organism mass ( $\Delta AICc=-1.7$  vs.  $-22.4$ , Fig. S4). In contrast, the effect of foraging cost  
62 manipulation became more evident ( $\Delta AICc=-40.8$  vs.  $-32.4$ , Fig. S4). The effect of both manipulations  
63 remained additive (developmental \* adult environment  $\Delta AICc=3.6$ ). Thus, both our manipulations  
64 affected mass, but the effect of the developmental manipulation occurred mostly via body size, while  
65 the effect of the adult manipulation was size independent.

66

67 *Fig. S3: Manipulation effects on mass with and without taking body size into account. Approximately*  
68 *half of the effect of the brood size manipulation on mass could be attributed to a size difference,*  
69 *while the foraging cost manipulation during adulthood affected mass irrespective of size. Shown is*  
70 *the mass difference between benign and harsh environment  $\pm 95CI$ .*

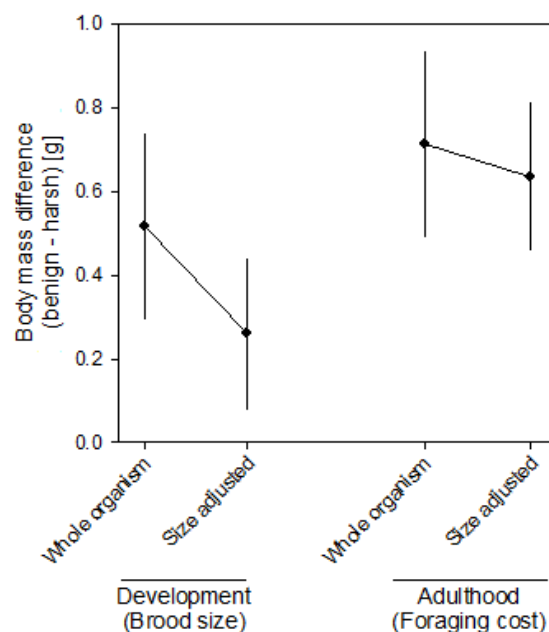

71

72 **Supplementary information 4: Data distribution plots over  $\Delta$ Age**

73 *Fig. S4: Data distribution plot of mass age trajectories with  $\Delta$ Age per experimental group. Most trajectories are quadratic, whereas, except for females in the*  
74 *hard treatment which are linear. Note that there is selective disappearance of light individuals in most groups around  $\Delta$ Age=0. Boxplots show median,*  
75 *quartiles and 95% CI. Horizontal lines connect medians. Residuals correct for time, seasonal variation and selective disappearance of light individuals where*  
76 *necessary.*

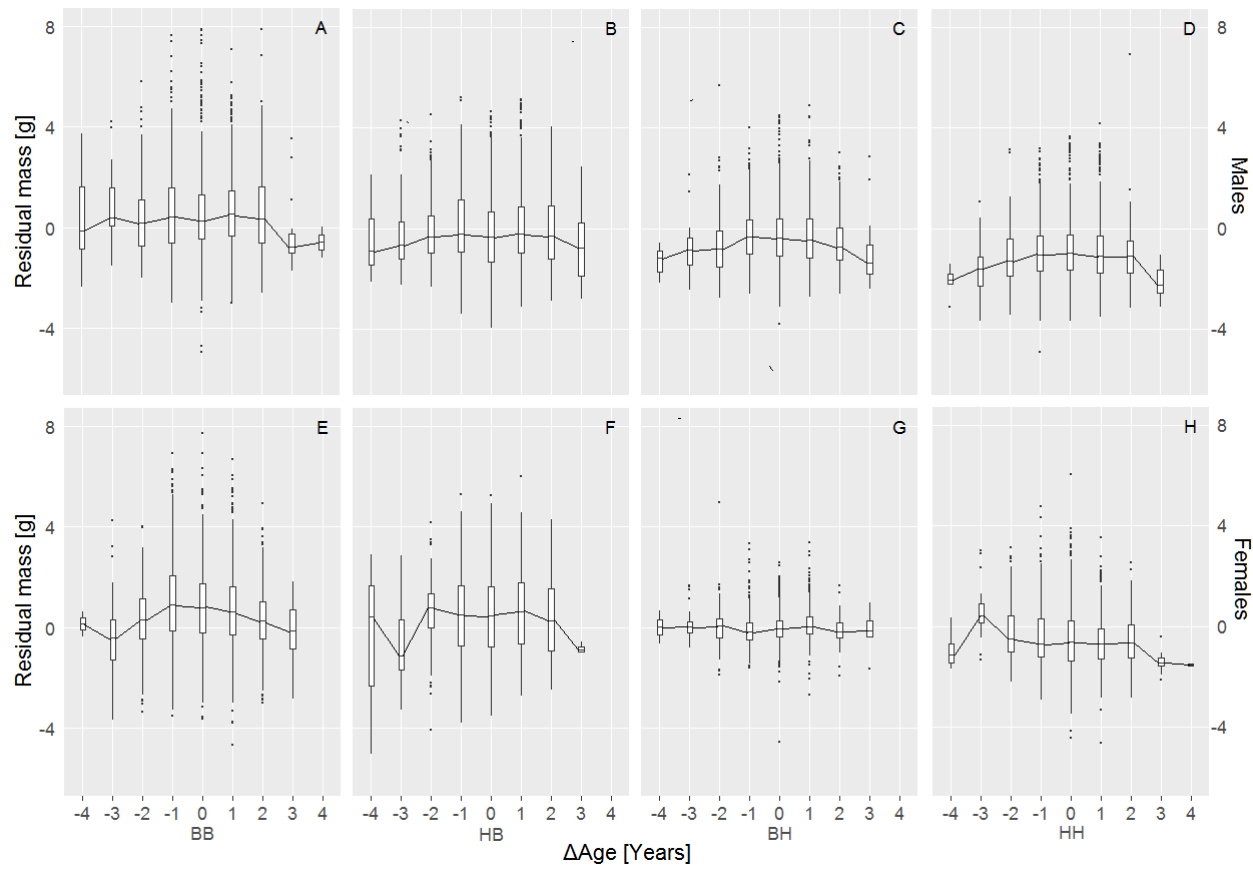

78 **Supplementary information 5: Model selection tables**

79 *Table S2: Manipulation effects on mass (g). Models are ordered by increasing AICc.*

| Model | Experimental manipulations |       |                       | Age covariates |                           |          | Time and seasonal covariates |       |                 |       |                 | Model Fit |         |               |        |
|-------|----------------------------|-------|-----------------------|----------------|---------------------------|----------|------------------------------|-------|-----------------|-------|-----------------|-----------|---------|---------------|--------|
|       | Brood size                 | Treat | Brood size<br>* Treat | $\Delta$ Age   | $\Delta$ Age <sup>2</sup> | Lifespan | Time                         | Night | Time<br>* Night | Photo | Time<br>* Photo | df        | AICc    | $\Delta$ AICc | weight |
| 1     | -0.56                      | -0.66 |                       | 0.03           | -0.03                     | 0.12     | -2.00                        | -5.54 | 8.38            | -0.49 | 0.80            | 16        | 36402.3 | 0.0           | 0.84   |
| 2     | -0.56                      | -0.65 | -0.01                 | 0.03           | -0.03                     | 0.12     | -2.00                        | -5.54 | 8.38            | -0.49 | 0.80            | 17        | 36405.5 | 3.3           | 0.17   |
| 3     |                            | -0.66 |                       | 0.03           | -0.03                     | 0.14     | -2.01                        | -5.55 | 8.39            | -0.49 | 0.80            | 15        | 36424.7 | 22.4          | 0.00   |
| 4     | -0.56                      |       |                       | 0.03           | -0.03                     | 0.12     | -2.00                        | -5.54 | 8.38            | -0.49 | 0.80            | 15        | 36434.7 | 32.4          | 0.00   |
| 5     |                            |       |                       | 0.03           | -0.03                     | 0.14     | -2.01                        | -5.55 | 8.38            | -0.49 | 0.81            | 14        | 36455.7 | 53.4          | 0.00   |

80

81 Table S3: The mass age trajectory and its response to environmental manipulations are sex-specific. Models are ordered by increasing AICc. Note that only  
 82 the 35 better fitting models are shown ( $\Delta AICc < 51$ ). Note the strong evidence for sex-specific age trajectories ( $\Delta Age^2 * Sex \Delta AICc = -46.2$ ), with treatment  
 83 specific age trajectories in females ( $Treat * Sex \Delta AICc = -37.9$ ) but not in males ( $\Delta Age^2 * Treat * Sex \Delta AICc = -37.9$ ).

| All Mass | Experimental manipulations |       | Age and Age * Experiment interactions |       |              |                |                      | Sex and Sex * Age interactions |          |       |       |       |              | Time and seasonal covariates |         |                        |       |       | Model Fit |       |         |         |      |               |
|----------|----------------------------|-------|---------------------------------------|-------|--------------|----------------|----------------------|--------------------------------|----------|-------|-------|-------|--------------|------------------------------|---------|------------------------|-------|-------|-----------|-------|---------|---------|------|---------------|
|          |                            |       | Brood size                            | Treat | $\Delta Age$ | $\Delta Age^2$ | Treat * $\Delta Age$ | Treat * $\Delta Age^2$         | Lifespan | Sex   | * Sex | * Sex | $\Delta Age$ | $\Delta Age^2$               | * Treat | $\Delta Age^2$ * Treat | Time  | Night | * Night   | Photo | * Photo | df      | AICc | $\Delta AICc$ |
| 1        | -0.36                      | -0.88 |                                       |       |              |                |                      |                                |          |       |       |       |              |                              |         |                        |       |       |           |       |         |         |      |               |
| 2        | -0.56                      | -0.88 | 0.02                                  | -0.12 |              |                | 0.10                 | 0.13                           | -0.55    |       | 0.41  |       | 0.08         |                              | -0.10   | -1.97                  | -5.52 | 8.35  | -0.46     | 0.75  | 19      | 36556.4 | 0.1  | 0.41          |
| 3        | -0.36                      | -0.88 | -0.01                                 | -0.12 |              |                | 0.10                 | 0.13                           | -0.36    | -0.38 | 0.41  | 0.05  | 0.08         |                              | -0.10   | -1.97                  | -5.52 | 8.35  | -0.46     | 0.75  | 21      | 36559.9 | 3.5  | 0.07          |
| 4        | -0.56                      | -0.88 | -0.01                                 | -0.12 |              |                | 0.10                 | 0.13                           | -0.55    |       | 0.41  | 0.05  | 0.08         |                              | -0.10   | -1.97                  | -5.52 | 8.35  | -0.46     | 0.75  | 20      | 36559.9 | 3.5  | 0.07          |
| 5        | -0.36                      | -0.88 | 0.02                                  | -0.12 | 0.01         |                | 0.10                 | 0.13                           | -0.36    | -0.38 | 0.41  |       | 0.08         |                              | -0.10   | -1.97                  | -5.52 | 8.35  | -0.46     | 0.75  | 21      | 36563.8 | 7.4  | 0.01          |
| 6        | -0.56                      | -0.88 | 0.02                                  | -0.12 | 0.01         |                | 0.10                 | 0.13                           | -0.55    |       | 0.41  |       | 0.08         |                              | -0.10   | -1.97                  | -5.52 | 8.35  | -0.46     | 0.75  | 20      | 36563.8 | 7.5  | 0.01          |
| 7        | -0.36                      | -0.88 | -0.01                                 | -0.12 | 0.01         |                | 0.10                 | 0.13                           | -0.36    | -0.38 | 0.41  | 0.05  | 0.08         |                              | -0.10   | -1.97                  | -5.52 | 8.35  | -0.46     | 0.75  | 22      | 36567.3 | 10.9 | 0.00          |
| 8        | -0.56                      | -0.88 | -0.01                                 | -0.12 | 0.01         |                | 0.10                 | 0.13                           | -0.55    |       | 0.41  | 0.05  | 0.08         |                              | -0.10   | -1.97                  | -5.52 | 8.35  | -0.46     | 0.75  | 21      | 36567.3 | 11.0 | 0.00          |
| 9        | -0.36                      | -0.88 | 0.00                                  | -0.12 | -0.02        |                | 0.10                 | 0.13                           | -0.36    | -0.38 | 0.41  | 0.03  | 0.08         | 0.04                         | -0.10   | -1.97                  | -5.52 | 8.35  | -0.46     | 0.75  | 23      | 36572.7 | 16.4 | 0.00          |
| 10       | -0.56                      | -0.88 | 0.00                                  | -0.12 | -0.01        |                | 0.10                 | 0.13                           | -0.55    |       | 0.41  | 0.03  | 0.08         | 0.04                         | -0.10   | -1.97                  | -5.52 | 8.35  | -0.46     | 0.75  | 22      | 36572.8 | 16.4 | 0.00          |
| 11       | -0.36                      | -0.66 | 0.02                                  | -0.08 |              |                | 0.03                 | 0.13                           | -0.15    | -0.38 |       |       | 0.03         |                              |         | -1.97                  | -5.52 | 8.34  | -0.46     | 0.76  | 18      | 36594.3 | 37.9 | 0.00          |
| 12       | -0.56                      | -0.67 | 0.02                                  | -0.08 |              |                | 0.03                 | 0.13                           | -0.34    |       |       |       | 0.03         |                              |         | -1.97                  | -5.52 | 8.34  | -0.46     | 0.76  | 17      | 36594.3 | 37.9 | 0.00          |
| 13       | -0.36                      | -0.84 | 0.02                                  | -0.08 |              |                | 0.03                 | 0.13                           | -0.32    | -0.38 | 0.34  |       | 0.03         |                              |         | -1.97                  | -5.52 | 8.34  | -0.46     | 0.76  | 19      | 36595.0 | 38.6 | 0.00          |
| 14       | -0.56                      | -0.84 | 0.02                                  | -0.08 |              |                | 0.03                 | 0.13                           | -0.51    |       | 0.34  |       | 0.03         |                              |         | -1.97                  | -5.52 | 8.34  | -0.46     | 0.76  | 18      | 36595.0 | 38.7 | 0.00          |
| 15       | -0.36                      | -0.66 | -0.01                                 | -0.08 |              |                | 0.03                 | 0.13                           | -0.15    | -0.38 |       | 0.05  | 0.03         |                              |         | -1.97                  | -5.52 | 8.33  | -0.46     | 0.76  | 19      | 36597.7 | 41.3 | 0.00          |
| 16       | -0.56                      | -0.67 | -0.01                                 | -0.08 |              |                | 0.03                 | 0.13                           | -0.34    |       |       | 0.05  | 0.03         |                              |         | -1.97                  | -5.52 | 8.34  | -0.46     | 0.76  | 18      | 36597.7 | 41.3 | 0.00          |
| 17       | -0.37                      | -0.84 | -0.01                                 | -0.08 |              |                | 0.03                 | 0.13                           | -0.32    | -0.38 | 0.34  | 0.05  | 0.03         |                              |         | -1.97                  | -5.52 | 8.33  | -0.46     | 0.76  | 20      | 36598.4 | 42.0 | 0.00          |
| 18       | -0.56                      | -0.84 | -0.01                                 | -0.08 |              |                | 0.03                 | 0.13                           | -0.51    | -0.38 | 0.34  | 0.05  | 0.03         |                              |         | -1.97                  | -5.52 | 8.34  | -0.46     | 0.76  | 19      | 36598.4 | 42.0 | 0.00          |
| 19       | -0.36                      | -0.66 | 0.02                                  | -0.08 | 0.00         |                | 0.03                 | 0.13                           | -0.15    | -0.38 |       |       | 0.03         |                              |         | -1.97                  | -5.52 | 8.34  | -0.46     | 0.76  | 19      | 36601.7 | 45.3 | 0.00          |
| 20       | -0.56                      | -0.67 | 0.02                                  | -0.08 | 0.00         |                | 0.03                 | 0.13                           | -0.34    |       |       |       | 0.03         |                              |         | -1.97                  | -5.52 | 8.34  | -0.46     | 0.76  | 18      | 36601.7 | 45.4 | 0.00          |
| 21       | -0.36                      | -0.84 | 0.02                                  | -0.08 | 0.00         |                | 0.03                 | 0.13                           | -0.32    | -0.38 | 0.34  |       | 0.03         |                              |         | -1.97                  | -5.52 | 8.34  | -0.46     | 0.76  | 20      | 36602.4 | 46.0 | 0.00          |
| 22       | -0.56                      | -0.84 | 0.02                                  | -0.08 | 0.00         |                | 0.03                 | 0.13                           | -0.51    | -0.38 | 0.34  |       | 0.03         |                              |         | -1.97                  | -5.52 | 8.34  | -0.46     | 0.76  | 19      | 36602.5 | 46.1 | 0.00          |
| 23       | -0.36                      | -0.66 | 0.02                                  | -0.06 |              |                | 0.03                 | 0.13                           | -0.12    | -0.38 |       |       |              |                              |         | -1.96                  | -5.51 | 8.32  | -0.46     | 0.76  | 17      | 36602.6 | 46.2 | 0.00          |
| 24       | -0.56                      | -0.67 | 0.02                                  | -0.06 |              |                | 0.03                 | 0.13                           | -0.32    |       |       |       |              |                              |         | -1.96                  | -5.51 | 8.32  | -0.46     | 0.76  | 16      | 36602.6 | 46.3 | 0.00          |
| 25       | -0.36                      | -0.83 | 0.02                                  | -0.06 |              |                | 0.03                 | 0.13                           | -0.30    | -0.38 | 0.33  |       |              |                              |         | -1.96                  | -5.51 | 8.32  | -0.46     | 0.76  | 18      | 36603.3 | 46.9 | 0.00          |
| 26       | -0.56                      | -0.84 | 0.02                                  | -0.06 |              |                | 0.03                 | 0.13                           | -0.49    |       | 0.33  |       |              |                              |         | -1.96                  | -5.51 | 8.32  | -0.46     | 0.76  | 17      | 36603.4 | 47.0 | 0.00          |
| 27       | -0.36                      | -0.66 | -0.01                                 | -0.08 | 0.00         |                | 0.03                 | 0.13                           | -0.15    | -0.38 |       | 0.05  | 0.03         |                              |         | -1.97                  | -5.52 | 8.33  | -0.46     | 0.76  | 20      | 36605.1 | 48.7 | 0.00          |
| 28       | -0.56                      | -0.67 | -0.01                                 | -0.08 | 0.00         |                | 0.03                 | 0.13                           | -0.34    |       |       | 0.05  | 0.03         |                              |         | -1.97                  | -5.52 | 8.34  | -0.46     | 0.76  | 19      | 36605.1 | 48.7 | 0.00          |
| 29       | -0.37                      | -0.83 | -0.01                                 | -0.08 | 0.00         |                | 0.03                 | 0.13                           | -0.32    | -0.38 | 0.34  | 0.05  | 0.03         |                              |         | -1.97                  | -5.52 | 8.33  | -0.46     | 0.76  | 21      | 36605.8 | 49.4 | 0.00          |
| 30       | -0.56                      | -0.84 | -0.01                                 | -0.08 | 0.00         |                | 0.03                 | 0.13                           | -0.51    | -0.38 | 0.34  | 0.05  | 0.03         |                              |         | -1.97                  | -5.52 | 8.34  | -0.46     | 0.76  | 20      | 36605.8 | 49.5 | 0.00          |
| 31       | -0.36                      | -0.64 | 0.02                                  | -0.06 |              |                | 0.13                 | 0.13                           | -0.15    | -0.38 |       |       | 0.03         |                              |         | -1.97                  | -5.52 | 8.35  | -0.47     | 0.76  | 17      | 36606.6 | 50.2 | 0.00          |
| 32       | -0.56                      | -0.64 | 0.02                                  | -0.06 |              |                | 0.13                 | 0.13                           | -0.34    |       |       |       | 0.03         |                              |         | -1.97                  | -5.52 | 8.35  | -0.47     | 0.76  | 16      | 36606.6 | 50.2 | 0.00          |
| 33       | -0.36                      | -0.66 | -0.01                                 | -0.06 |              |                | 0.03                 | 0.13                           | -0.12    | -0.38 |       | 0.05  |              |                              |         | -1.96                  | -5.51 | 8.31  | -0.47     | 0.76  | 18      | 36606.9 | 50.6 | 0.00          |
| 34       | -0.56                      | -0.67 | -0.01                                 | -0.06 |              |                | 0.03                 | 0.13                           | -0.32    |       |       | 0.05  |              |                              |         | -1.96                  | -5.51 | 8.32  | -0.47     | 0.76  | 17      | 36607.0 | 50.6 | 0.00          |
| 35       | -0.56                      | -0.66 | 0.02                                  | -0.06 |              |                | 0.03                 | 0.12                           |          |       |       |       |              |                              |         | -1.96                  | -5.51 | 8.32  | -0.47     | 0.76  | 15      | 36607.1 | 50.7 | 0.00          |

84  
85



86 *Table S4: No evidence that the mass age trajectory of males varies between experimental manipulations.*

| Male Mass | Experimental manipulations |       |                    | Age terms and interactions |                   |                   |                                |              |                           |                |                             |          | Time and seasonal covariates |       |         |       |         | Model Fit |         |       |        |
|-----------|----------------------------|-------|--------------------|----------------------------|-------------------|-------------------|--------------------------------|--------------|---------------------------|----------------|-----------------------------|----------|------------------------------|-------|---------|-------|---------|-----------|---------|-------|--------|
|           | Brood size                 | Treat | Brood size * Treat | ΔAge                       | ΔAge <sup>2</sup> | Brood size * ΔAge | Brood size * ΔAge <sup>2</sup> | Treat * ΔAge | Treat * ΔAge <sup>2</sup> | * Treat * ΔAge | * Treat * ΔAge <sup>2</sup> | Lifespan | Time                         | Night | * Night | Photo | * Photo | df        | AICc    | ΔAICc | weight |
| 1         | -0.74                      | -0.46 |                    | 0.04                       | -0.02             |                   |                                |              |                           |                |                             | 0.11     | -1.43                        | -3.62 | 7.19    | -0.38 | 0.52    | 16        | 16743.4 | 0.0   | 0.70   |
| 2         | -0.79                      | -0.50 | 0.08               | 0.04                       | -0.02             |                   |                                |              |                           |                |                             | 0.11     | -1.43                        | -3.62 | 7.19    | -0.38 | 0.52    | 17        | 16745.9 | 2.5   | 0.21   |
| 3         | -0.74                      | -0.46 |                    | 0.04                       | -0.02             | -0.003            |                                |              |                           |                |                             | 0.11     | -1.43                        | -3.62 | 7.19    | -0.38 | 0.53    | 17        | 16750.5 | 7.1   | 0.02   |
| 4         | -0.74                      | -0.46 |                    | 0.04                       | -0.02             |                   |                                | 0.002        |                           |                |                             | 0.11     | -1.43                        | -3.62 | 7.19    | -0.38 | 0.53    | 17        | 16750.5 | 7.1   | 0.02   |
| 5         | -0.74                      | -0.46 |                    | 0.04                       | -0.02             |                   | -0.009                         |              |                           |                |                             | 0.11     | -1.43                        | -3.62 | 7.19    | -0.38 | 0.53    | 17        | 16751.3 | 7.8   | 0.01   |
| 6         | -0.74                      | -0.45 |                    | 0.04                       | -0.02             |                   |                                |              | -0.004                    |                |                             | 0.11     | -1.43                        | -3.62 | 7.19    | -0.38 | 0.52    | 17        | 16751.4 | 8.0   | 0.01   |
| 7         | -0.79                      | -0.50 | 0.08               | 0.04                       | -0.02             | -0.003            |                                |              |                           |                |                             | 0.11     | -1.43                        | -3.62 | 7.19    | -0.38 | 0.53    | 18        | 16753.0 | 9.5   | 0.01   |
| 8         | -0.79                      | -0.50 | 0.08               | 0.04                       | -0.02             |                   |                                | 0.002        |                           |                |                             | 0.11     | -1.43                        | -3.62 | 7.19    | -0.38 | 0.53    | 18        | 16753.0 | 9.5   | 0.01   |
| 9         | -0.78                      | -0.50 | 0.08               | 0.04                       | -0.02             |                   | -0.009                         |              |                           |                |                             | 0.11     | -1.43                        | -3.62 | 7.19    | -0.38 | 0.53    | 18        | 16753.7 | 10.3  | 0.00   |
| 10        | -0.79                      | -0.50 | 0.08               | 0.04                       | -0.02             |                   |                                |              | -0.004                    |                |                             | 0.11     | -1.43                        | -3.62 | 7.19    | -0.38 | 0.52    | 18        | 16753.9 | 10.4  | 0.00   |
| 11        | -0.74                      | -0.46 |                    | 0.04                       | -0.02             | -0.003            |                                | 0.002        |                           |                |                             | 0.11     | -1.43                        | -3.62 | 7.19    | -0.38 | 0.53    | 18        | 16757.6 | 14.1  | 0.00   |
| 12        | -0.74                      | -0.46 |                    | 0.04                       | -0.02             | -0.005            | -0.009                         |              |                           |                |                             | 0.11     | -1.43                        | -3.62 | 7.19    | -0.39 | 0.53    | 18        | 16758.3 | 14.8  | 0.00   |
| 13        | -0.74                      | -0.46 |                    | 0.04                       | -0.02             |                   | -0.009                         | 0.002        |                           |                |                             | 0.11     | -1.43                        | -3.62 | 7.19    | -0.39 | 0.53    | 18        | 16758.3 | 14.9  | 0.00   |
| 14        | -0.74                      | -0.45 |                    | 0.04                       | -0.02             |                   |                                | 0.001        | -0.003                    |                |                             | 0.11     | -1.43                        | -3.62 | 7.19    | -0.38 | 0.53    | 18        | 16758.5 | 15.0  | 0.00   |
| 15        | -0.74                      | -0.45 |                    | 0.04                       | -0.02             | -0.003            |                                |              | -0.004                    |                |                             | 0.11     | -1.43                        | -3.62 | 7.19    | -0.38 | 0.53    | 18        | 16758.5 | 15.0  | 0.00   |
| 16        | -0.74                      | -0.45 |                    | 0.04                       | -0.01             |                   | -0.009                         |              | -0.003                    |                |                             | 0.11     | -1.43                        | -3.62 | 7.19    | -0.39 | 0.53    | 18        | 16759.2 | 15.8  | 0.00   |
| 17        | -0.79                      | -0.50 | 0.08               | 0.04                       | -0.02             | -0.003            |                                | 0.002        |                           |                |                             | 0.11     | -1.43                        | -3.62 | 7.19    | -0.38 | 0.53    | 19        | 16760.0 | 16.6  | 0.00   |
| 18        | -0.78                      | -0.50 | 0.08               | 0.04                       | -0.02             | -0.005            | -0.009                         |              |                           |                |                             | 0.11     | -1.43                        | -3.62 | 7.19    | -0.39 | 0.53    | 19        | 16760.7 | 17.3  | 0.00   |
| 19        | -0.78                      | -0.50 | 0.08               | 0.04                       | -0.02             |                   | -0.009                         | 0.002        |                           |                |                             | 0.11     | -1.43                        | -3.62 | 7.19    | -0.39 | 0.53    | 19        | 16760.8 | 17.3  | 0.00   |
| 20        | -0.79                      | -0.50 | 0.08               | 0.04                       | -0.02             |                   |                                | 0.001        | -0.003                    |                |                             | 0.11     | -1.43                        | -3.62 | 7.19    | -0.38 | 0.53    | 19        | 16760.9 | 17.5  | 0.00   |
| 21        | -0.79                      | -0.50 | 0.08               | 0.04                       | -0.02             | -0.003            |                                |              | -0.004                    |                |                             | 0.11     | -1.43                        | -3.62 | 7.19    | -0.38 | 0.53    | 19        | 16760.9 | 17.5  | 0.00   |
| 22        | -0.78                      | -0.50 | 0.08               | 0.04                       | -0.01             |                   | -0.009                         |              | -0.003                    |                |                             | 0.11     | -1.43                        | -3.62 | 7.19    | -0.39 | 0.53    | 19        | 16761.7 | 18.2  | 0.00   |
| 23        | -0.74                      | -0.46 |                    | 0.04                       | -0.02             | -0.005            | -0.009                         | 0.002        |                           |                |                             | 0.11     | -1.43                        | -3.62 | 7.19    | -0.39 | 0.53    | 19        | 16765.3 | 21.9  | 0.00   |
| 24        | -0.79                      | -0.50 | 0.08               | 0.05                       | -0.02             | -0.017            |                                | -0.011       |                           | 0.03           |                             | 0.11     | -1.43                        | -3.62 | 7.19    | -0.39 | 0.53    | 20        | 16765.5 | 22.0  | 0.00   |
| 25        | -0.74                      | -0.45 |                    | 0.04                       | -0.02             | -0.003            |                                | 0.001        | -0.003                    |                |                             | 0.11     | -1.43                        | -3.62 | 7.19    | -0.39 | 0.53    | 19        | 16765.5 | 22.1  | 0.00   |
| 26        | -0.74                      | -0.45 |                    | 0.04                       | -0.01             | -0.005            | -0.009                         |              | -0.003                    |                |                             | 0.11     | -1.43                        | -3.62 | 7.19    | -0.39 | 0.53    | 19        | 16766.2 | 22.8  | 0.00   |
| 27        | -0.74                      | -0.45 |                    | 0.04                       | -0.01             |                   | -0.009                         | 0.001        | -0.003                    |                |                             | 0.11     | -1.43                        | -3.62 | 7.19    | -0.39 | 0.53    | 19        | 16766.3 | 22.8  | 0.00   |
| 28        | -0.78                      | -0.49 | 0.07               | 0.04                       | -0.003            |                   | -0.035                         |              | -0.030                    |                | 0.06                        | 0.11     | -1.43                        | -3.62 | 7.19    | -0.39 | 0.53    | 20        | 16766.4 | 23.0  | 0.00   |
| 29        | -0.78                      | -0.50 | 0.08               | 0.04                       | -0.02             | -0.005            | -0.009                         | 0.002        |                           |                |                             | 0.11     | -1.43                        | -3.62 | 7.19    | -0.39 | 0.53    | 20        | 16767.8 | 24.3  | 0.00   |
| 30        | -0.79                      | -0.50 | 0.08               | 0.04                       | -0.02             | -0.003            |                                | 0.001        | -0.003                    |                |                             | 0.11     | -1.43                        | -3.62 | 7.19    | -0.39 | 0.53    | 20        | 16768.0 | 24.5  | 0.00   |
| 31        | -0.78                      | -0.50 | 0.08               | 0.04                       | -0.01             | -0.005            | -0.009                         |              | -0.003                    |                |                             | 0.11     | -1.43                        | -3.62 | 7.19    | -0.39 | 0.53    | 20        | 16768.7 | 25.3  | 0.00   |
| 32        | -0.78                      | -0.50 | 0.08               | 0.04                       | -0.01             |                   | -0.009                         | 0.001        | -0.003                    |                |                             | 0.11     | -1.43                        | -3.62 | 7.19    | -0.39 | 0.53    | 20        | 16768.7 | 25.3  | 0.00   |
| 33        | -0.78                      | -0.50 | 0.08               | 0.05                       | -0.02             | -0.020            | -0.010                         | -0.012       |                           | 0.03           |                             | 0.11     | -1.43                        | -3.62 | 7.19    | -0.39 | 0.53    | 21        | 16773.2 | 29.8  | 0.00   |
| 34        | -0.74                      | -0.45 |                    | 0.04                       | -0.01             | -0.005            | -0.009                         | 0.001        | -0.003                    |                |                             | 0.11     | -1.43                        | -3.62 | 7.19    | -0.39 | 0.53    | 20        | 16773.3 | 29.8  | 0.00   |
| 35        | -0.78                      | -0.49 | 0.07               | 0.04                       | -0.003            | -0.006            | -0.035                         |              | -0.030                    |                | 0.06                        | 0.11     | -1.43                        | -3.62 | 7.19    | -0.39 | 0.53    | 21        | 16773.4 | 30.0  | 0.00   |
| 36        | -0.79                      | -0.50 | 0.08               | 0.05                       | -0.02             | -0.017            |                                | -0.012       | -0.003                    | 0.03           |                             | 0.11     | -1.43                        | -3.62 | 7.19    | -0.39 | 0.53    | 21        | 16773.4 | 30.0  | 0.00   |
| 37        | -0.78                      | -0.49 | 0.07               | 0.04                       | -0.003            |                   | -0.035                         | 0.000        | -0.030                    |                | 0.06                        | 0.11     | -1.43                        | -3.62 | 7.19    | -0.39 | 0.53    | 21        | 16773.4 | 30.0  | 0.00   |
| 38        | -0.78                      | -0.50 | 0.08               | 0.04                       | -0.01             | -0.005            | -0.009                         | 0.001        | -0.003                    |                |                             | 0.11     | -1.43                        | -3.62 | 7.19    | -0.39 | 0.53    | 21        | 16775.7 | 32.3  | 0.00   |
| 39        | -0.78                      | -0.49 | 0.07               | 0.04                       | -0.003            | -0.006            | -0.035                         | 0.001        | -0.030                    |                | 0.06                        | 0.11     | -1.43                        | -3.62 | 7.19    | -0.39 | 0.53    | 22        | 16780.4 | 37.0  | 0.00   |
| 40        | -0.78                      | -0.50 | 0.08               | 0.05                       | -0.01             | -0.020            | -0.009                         | -0.012       | -0.003                    | 0.03           |                             | 0.11     | -1.43                        | -3.62 | 7.19    | -0.39 | 0.53    | 22        | 16781.2 | 37.8  | 0.00   |
| 41        | -0.78                      | -0.49 | 0.07               | 0.05                       | -0.001            | -0.028            | -0.037                         | -0.020       | -0.032                    | 0.04           | 0.06                        | 0.11     | -1.43                        | -3.62 | 7.19    | -0.39 | 0.53    | 23        | 16785.6 | 42.2  | 0.00   |

88 Table S5: Mass age trajectory of females differs between benign and harsh foraging treatment (Treat \* ΔAge<sup>2</sup> ΔAICc=-16.1).

| Female Mass | Experimental manipulations |       |                    | Age terms and interactions |                   |                   |                                |              |                           |                           |                                        | Time and seasonal covariates |       |       |         |       | Model Fit |    |         |       |        |
|-------------|----------------------------|-------|--------------------|----------------------------|-------------------|-------------------|--------------------------------|--------------|---------------------------|---------------------------|----------------------------------------|------------------------------|-------|-------|---------|-------|-----------|----|---------|-------|--------|
|             | Brood size                 | Treat | Brood size * Treat | ΔAge                       | ΔAge <sup>2</sup> | Brood size * ΔAge | Brood size * ΔAge <sup>2</sup> | Treat * ΔAge | Treat * ΔAge <sup>2</sup> | Brood size * Treat * ΔAge | Brood size * Treat * ΔAge <sup>2</sup> | Lifespan                     | Time  | Night | * Night | Photo | * Photo   | df | AICc    | ΔAICc | weight |
| 1           | -0.37                      | -0.89 |                    | 0.01                       | -0.11             |                   |                                |              | 0.12                      |                           |                                        | 0.14                         | -2.98 | -8.12 | 10.45   | -0.60 | 1.09      | 17 | 18471.2 | 0     | 0.41   |
| 2           | -0.35                      | -0.87 | -0.05              | -0.02                      | -0.11             | 0.07              |                                | 0.14         | 0.13                      | -0.30                     |                                        | 0.14                         | -2.98 | -8.11 | 10.43   | -0.61 | 1.10      | 21 | 18472.9 | 1.7   | 0.18   |
| 3           | -0.37                      | -0.89 |                    | 0.06                       | -0.11             | -0.09             |                                |              | 0.13                      |                           |                                        | 0.14                         | -2.98 | -8.11 | 10.43   | -0.60 | 1.09      | 18 | 18473.1 | 1.9   | 0.16   |
| 4           | -0.35                      | -0.87 | -0.03              | 0.01                       | -0.11             |                   |                                |              | 0.12                      |                           |                                        | 0.14                         | -2.98 | -8.12 | 10.45   | -0.60 | 1.09      | 18 | 18473.9 | 2.6   | 0.11   |
| 5           | -0.36                      | -0.87 | -0.03              | 0.06                       | -0.11             | -0.09             |                                |              | 0.13                      |                           |                                        | 0.14                         | -2.98 | -8.11 | 10.43   | -0.60 | 1.09      | 19 | 18475.8 | 4.6   | 0.04   |
| 6           | -0.38                      | -0.89 |                    | 0.01                       | -0.13             |                   | 0.04                           |              | 0.13                      |                           |                                        | 0.14                         | -2.98 | -8.12 | 10.45   | -0.61 | 1.10      | 18 | 18476.0 | 4.8   | 0.04   |
| 7           | -0.37                      | -0.89 |                    | 0.01                       | -0.11             |                   |                                | 0.003        | 0.12                      |                           |                                        | 0.14                         | -2.98 | -8.12 | 10.45   | -0.60 | 1.09      | 18 | 18477.7 | 6.4   | 0.02   |
| 8           | -0.37                      | -0.87 | -0.03              | 0.01                       | -0.13             |                   | 0.04                           |              | 0.13                      |                           |                                        | 0.14                         | -2.98 | -8.12 | 10.45   | -0.61 | 1.10      | 19 | 18478.7 | 7.4   | 0.01   |
| 9           | -0.36                      | -0.87 | -0.05              | -0.03                      | -0.12             | 0.08              | 0.03                           | 0.14         | 0.13                      | -0.30                     |                                        | 0.14                         | -2.98 | -8.11 | 10.43   | -0.61 | 1.10      | 22 | 18479.4 | 8.2   | 0.01   |
| 10          | -0.37                      | -0.89 |                    | 0.06                       | -0.11             | -0.09             |                                | -0.002       | 0.12                      |                           |                                        | 0.14                         | -2.98 | -8.11 | 10.43   | -0.60 | 1.09      | 19 | 18479.6 | 8.4   | 0.01   |
| 11          | -0.38                      | -0.89 |                    | 0.05                       | -0.12             | -0.07             | 0.03                           |              | 0.13                      |                           |                                        | 0.14                         | -2.98 | -8.11 | 10.44   | -0.61 | 1.10      | 19 | 18479.7 | 8.4   | 0.01   |
| 12          | -0.35                      | -0.87 | -0.03              | 0.01                       | -0.11             |                   |                                | 0.003        | 0.12                      |                           |                                        | 0.14                         | -2.98 | -8.12 | 10.45   | -0.60 | 1.09      | 19 | 18480.3 | 9.1   | 0.00   |
| 13          | -0.36                      | -0.87 | -0.03              | 0.06                       | -0.11             | -0.09             |                                | -0.002       | 0.12                      |                           |                                        | 0.14                         | -2.98 | -8.11 | 10.43   | -0.60 | 1.09      | 20 | 18482.2 | 11.0  | 0.00   |
| 14          | -0.36                      | -0.87 | -0.03              | 0.05                       | -0.12             | -0.07             | 0.03                           |              | 0.13                      |                           |                                        | 0.14                         | -2.98 | -8.11 | 10.44   | -0.61 | 1.10      | 20 | 18482.3 | 11.1  | 0.00   |
| 15          | -0.38                      | -0.89 |                    | 0.01                       | -0.13             |                   | 0.04                           | 0.002        | 0.13                      |                           |                                        | 0.14                         | -2.98 | -8.12 | 10.45   | -0.61 | 1.10      | 19 | 18482.5 | 11.2  | 0.00   |
| 16          | -0.36                      | -0.87 | -0.04              | 0.01                       | -0.12             |                   | 0.03                           |              | 0.11                      |                           | 0.03                                   | 0.14                         | -2.98 | -8.12 | 10.45   | -0.61 | 1.10      | 20 | 18484.6 | 13.4  | 0.00   |
| 17          | -0.36                      | -0.87 | -0.03              | -0.04                      | -0.13             | 0.09              | 0.05                           | 0.16         | 0.15                      | -0.33                     | -0.05                                  | 0.14                         | -2.97 | -8.11 | 10.42   | -0.61 | 1.10      | 23 | 18484.7 | 13.5  | 0.00   |
| 18          | -0.37                      | -0.87 | -0.03              | 0.01                       | -0.13             |                   | 0.04                           | 0.002        | 0.13                      |                           |                                        | 0.14                         | -2.98 | -8.12 | 10.45   | -0.61 | 1.10      | 20 | 18485.1 | 13.9  | 0.00   |
| 19          | -0.38                      | -0.89 |                    | 0.05                       | -0.12             | -0.07             | 0.03                           | -0.002       | 0.13                      |                           |                                        | 0.14                         | -2.98 | -8.11 | 10.44   | -0.61 | 1.10      | 20 | 18486.1 | 14.9  | 0.00   |
| 20          | -0.37                      | -0.85 |                    | 0.01                       | -0.05             |                   |                                |              |                           |                           |                                        | 0.14                         | -2.99 | -8.13 | 10.46   | -0.62 | 1.11      | 16 | 18487.3 | 16.1  | 0.00   |
| 21          | -0.35                      | -0.83 | -0.05              | 0.01                       | -0.05             | 0.07              |                                | 0.07         |                           | -0.30                     |                                        | 0.14                         | -2.99 | -8.12 | 10.44   | -0.61 | 1.11      | 20 | 18487.7 | 16.5  | 0.00   |
| 22          | -0.36                      | -0.87 | -0.04              | 0.05                       | -0.11             | -0.07             | 0.01                           |              | 0.11                      |                           | 0.03                                   | 0.14                         | -2.98 | -8.12 | 10.44   | -0.61 | 1.10      | 21 | 18488.2 | 17.0  | 0.00   |
| 23          | -0.36                      | -0.87 | -0.03              | 0.05                       | -0.12             | -0.07             | 0.03                           | -0.002       | 0.13                      |                           |                                        | 0.14                         | -2.98 | -8.11 | 10.44   | -0.61 | 1.10      | 21 | 18488.7 | 17.5  | 0.00   |
| 24          | -0.35                      | -0.83 | -0.03              | 0.01                       | -0.05             |                   |                                |              |                           |                           |                                        | 0.14                         | -2.99 | -8.13 | 10.46   | -0.62 | 1.11      | 17 | 18489.9 | 18.7  | 0.00   |
| 25          | -0.37                      | -0.85 |                    | 0.05                       | -0.05             | -0.07             |                                |              |                           |                           |                                        | 0.14                         | -2.99 | -8.12 | 10.45   | -0.62 | 1.12      | 17 | 18490.6 | 19.4  | 0.00   |
| 26          | -0.36                      | -0.87 | -0.04              | 0.01                       | -0.12             |                   | 0.03                           | 0.00         | 0.11                      |                           | 0.03                                   | 0.14                         | -2.98 | -8.12 | 10.45   | -0.61 | 1.10      | 21 | 18491.0 | 19.8  | 0.00   |
| 27          | -0.37                      | -0.85 |                    | 0.05                       | -0.05             |                   |                                | -0.07        |                           |                           |                                        | 0.14                         | -2.99 | -8.12 | 10.46   | -0.61 | 1.11      | 17 | 18491.5 | 20.3  | 0.00   |
| 28          | -0.36                      | -0.83 | -0.03              | 0.05                       | -0.05             | -0.07             |                                |              |                           |                           |                                        | 0.14                         | -2.99 | -8.12 | 10.45   | -0.62 | 1.12      | 18 | 18493.2 | 22.0  | 0.00   |
| 29          | -0.38                      | -0.85 |                    | 0.01                       | -0.06             |                   | 0.03                           |              |                           |                           |                                        | 0.14                         | -2.99 | -8.13 | 10.46   | -0.62 | 1.12      | 17 | 18493.6 | 22.4  | 0.00   |
| 30          | -0.37                      | -0.85 |                    | 0.09                       | -0.05             | -0.08             |                                | -0.08        |                           |                           |                                        | 0.14                         | -2.98 | -8.12 | 10.44   | -0.61 | 1.11      | 18 | 18494.0 | 22.8  | 0.00   |
| 31          | -0.35                      | -0.84 | -0.03              | 0.05                       | -0.05             |                   |                                | -0.07        |                           |                           |                                        | 0.14                         | -2.99 | -8.12 | 10.46   | -0.61 | 1.11      | 18 | 18494.1 | 22.9  | 0.00   |
| 32          | -0.36                      | -0.87 | -0.04              | 0.05                       | -0.11             | -0.07             | 0.01                           | -0.002       | 0.11                      |                           | 0.03                                   | 0.14                         | -2.98 | -8.12 | 10.44   | -0.61 | 1.10      | 22 | 18494.7 | 23.5  | 0.00   |
| 33          | -0.35                      | -0.83 | -0.05              | 0.01                       | -0.05             | 0.08              | 0.01                           | 0.07         |                           | -0.30                     |                                        | 0.14                         | -2.99 | -8.12 | 10.44   | -0.62 | 1.11      | 21 | 18494.7 | 23.5  | 0.00   |
| 34          | -0.36                      | -0.83 | -0.03              | 0.01                       | -0.06             |                   | 0.03                           |              |                           |                           |                                        | 0.14                         | -2.99 | -8.13 | 10.46   | -0.62 | 1.12      | 18 | 18496.2 | 25.0  | 0.00   |
| 35          | -0.36                      | -0.84 | -0.03              | 0.09                       | -0.05             | -0.08             |                                | -0.08        |                           |                           |                                        | 0.14                         | -2.98 | -8.12 | 10.44   | -0.61 | 1.11      | 19 | 18496.6 | 25.4  | 0.00   |
| 36          | -0.38                      | -0.85 |                    | 0.05                       | -0.06             |                   | 0.03                           | -0.08        |                           |                           |                                        | 0.14                         | -2.99 | -8.12 | 10.46   | -0.61 | 1.11      | 18 | 18497.4 | 26.2  | 0.00   |
| 37          | -0.38                      | -0.85 |                    | 0.04                       | -0.05             | -0.07             | 0.01                           |              |                           |                           |                                        | 0.14                         | -2.99 | -8.12 | 10.45   | -0.62 | 1.12      | 18 | 18497.6 | 26.4  | 0.00   |
| 38          | -0.37                      | -0.84 | -0.03              | 0.05                       | -0.06             |                   | 0.03                           | -0.08        |                           |                           |                                        | 0.14                         | -2.99 | -8.12 | 10.46   | -0.61 | 1.11      | 19 | 18500.0 | 28.8  | 0.00   |
| 39          | -0.36                      | -0.83 | -0.03              | 0.04                       | -0.05             | -0.07             | 0.01                           |              |                           |                           |                                        | 0.14                         | -2.99 | -8.12 | 10.45   | -0.62 | 1.12      | 19 | 18500.2 | 29.0  | 0.00   |
| 40          | -0.38                      | -0.85 |                    | 0.09                       | -0.05             | -0.07             | 0.01                           | -0.08        |                           |                           |                                        | 0.14                         | -2.98 | -8.12 | 10.44   | -0.61 | 1.11      | 19 | 18501.0 | 29.8  | 0.00   |
| 41          | -0.36                      | -0.84 | -0.03              | 0.09                       | -0.05             | -0.07             | 0.01                           | -0.08        |                           |                           |                                        | 0.14                         | -2.98 | -8.12 | 10.44   | -0.61 | 1.11      | 20 | 18503.7 | 32.4  | 0.00   |

89

90 Table S6: Mass age trajectory depends on developmental conditions (brood size) for females in the harsh (B) but not in the benign foraging treatment (A).

| <b>(A) Mass females in benign treatment</b> |                            |              |                           |                           |                                        |          |                              |       |         |       |        |           |        |               |        |
|---------------------------------------------|----------------------------|--------------|---------------------------|---------------------------|----------------------------------------|----------|------------------------------|-------|---------|-------|--------|-----------|--------|---------------|--------|
| Model                                       | Age terms and interactions |              |                           |                           |                                        |          | Time and seasonal covariates |       |         |       |        | Model Fit |        |               |        |
|                                             | Brood size                 | $\Delta$ Age | $\Delta$ Age <sup>2</sup> | Brood size * $\Delta$ Age | Brood size * $\Delta$ Age <sup>2</sup> | Lifespan | Time                         | Night | * Night | Photo | *Photo | df        | AICc   | $\Delta$ AICc | weight |
| 1                                           | -0.36                      | 0.01         | -0.11                     |                           |                                        | 0.15     | -2.31                        | -8.45 | 8.97    | -0.62 | 1.26   | 15        | 9854.5 | 0.0           | 0.85   |
| 2                                           | -0.36                      | -0.03        | -0.11                     | 0.07                      |                                        | 0.14     | -2.32                        | -8.46 | 8.98    | -0.62 | 1.26   | 16        | 9858.6 | 4.1           | 0.11   |
| 3                                           | -0.37                      | 0.01         | -0.12                     |                           | 0.02                                   | 0.15     | -2.31                        | -8.44 | 8.96    | -0.62 | 1.26   | 16        | 9861.0 | 6.5           | 0.03   |
| 4                                           | -0.37                      | -0.04        | -0.13                     | 0.10                      | 0.05                                   | 0.15     | -2.31                        | -8.44 | 8.96    | -0.62 | 1.26   | 17        | 9863.8 | 9.3           | 0.01   |
| 5                                           | -0.37                      | 0.07         |                           |                           |                                        | 0.14     | -2.29                        | -8.41 | 8.88    | -0.65 | 1.31   | 14        | 9869.5 | 15.0          | 0.00   |
| 6                                           | -0.37                      | 0.03         |                           | 0.08                      |                                        | 0.14     | -2.30                        | -8.41 | 8.89    | -0.65 | 1.31   | 15        | 9873.4 | 18.9          | 0.00   |
| <b>(B) Mass females in harsh treatment</b>  |                            |              |                           |                           |                                        |          |                              |       |         |       |        |           |        |               |        |
| 1                                           | -0.40                      | 0.10         |                           | -0.24                     |                                        | 0.14     | -3.31                        | -7.40 | 11.26   | -0.55 | 0.86   | 15        | 8175.3 | 0.0           | 0.98   |
| 2                                           | -0.40                      | 0.10         | 0.01                      | -0.24                     |                                        | 0.14     | -3.31                        | -7.39 | 11.24   | -0.55 | 0.86   | 16        | 8183.4 | 8.2           | 0.02   |
| 3                                           | -0.39                      | -0.01        |                           |                           |                                        | 0.14     | -3.31                        | -7.40 | 11.27   | -0.55 | 0.85   | 14        | 8186.2 | 10.9          | 0.00   |
| 4                                           | -0.40                      | 0.10         | 0.01                      | -0.24                     | -0.0005                                | 0.14     | -3.30                        | -7.39 | 11.24   | -0.55 | 0.86   | 17        | 8190.4 | 15.1          | 0.00   |
| 5                                           | -0.39                      | 0.00         | 0.01                      |                           |                                        | 0.14     | -3.31                        | -7.40 | 11.26   | -0.55 | 0.85   | 15        | 8194.4 | 19.1          | 0.00   |
| 6                                           | -0.40                      | 0.00         | -0.02                     |                           | 0.05                                   | 0.14     | -3.32                        | -7.41 | 11.28   | -0.55 | 0.86   | 16        | 8199.3 | 24.1          | 0.00   |

91

92 **Supplementary Information 6: References**

- 93 1. Brodin, A. 2007 Theoretical models of adaptive energy management in small wintering birds.  
94 *Philos. Trans. R. Soc. Lond. B. Biol. Sci.* **362**, 1857–1871. (doi:10.1098/rstb.2006.1812)
- 95 2. Krams, I., Cirule, D., Suraka, V., Krama, T., Rantala, M. J. & Ramey, G. 2010 Fattening strategies  
96 of wintering great tits support the optimal body mass hypothesis under conditions of  
97 extremely low ambient temperature. *Funct. Ecol.* **24**, 172–177. (doi:10.1111/j.1365-  
98 2435.2009.01628.x)
- 99 3. Rogers, C. M. 2015 Testing optimal body mass theory: Evidence for cost of fat in wintering  
100 birds. *Ecosphere* **6**, 1–12. (doi:10.1890/ES14-00317.1)
- 101 4. Meijer, T., Rozman, J. & Schulte, M. 1996 New findings in body mass regulation in zebra  
102 finches (*Taeniopygia guttata*) in response to photoperiod and temperature. *J. Zool.* **240**, 717–  
103 734.
- 104 5. Bouwhuis, S., Sheldon, B. C. & Verhulst, S. 2011 Basal metabolic rate and the rate of  
105 senescence in the great tit. *Funct. Ecol.* **25**, 829–838. (doi:10.1111/j.1365-2435.2011.01850.x)
- 106 6. van de Pol, M. & Verhulst, S. 2006 Age-dependent traits: a new statistical model to separate  
107 within- and between-individual effects. *Am. Nat.* **167**, 766–73. (doi:10.1086/503331)
- 108 7. Maklakov, A. A. et al. 2009 Sex differences in nutrient-dependent reproductive ageing. *Aging*  
109 *Cell* **8**, 324–330. (doi:10.1111/j.1474-9726.2009.00479.x)
- 110 8. Bouwhuis, S., Sheldon, B. C., Verhulst, S. & Charmantier, A. 2009 Great tits growing old:  
111 selective disappearance and the partitioning of senescence to stages within the breeding  
112 cycle. *Proc. R. Soc. B Biol. Sci.* **276**, 2769–77. (doi:10.1098/rspb.2009.0457)
